# Supplementary material for: Vanadium(iv/v)–p-dioxolene temperature induced electron transfer associated with ligation/deligation of solvent molecules
Source: Royal Society of Chemistry journal article supplement (doi:10.1039/c3dt50619c), 2013-01-01
Supplement: c3dt50619c.pdf [file c3dt50619c.pdf]

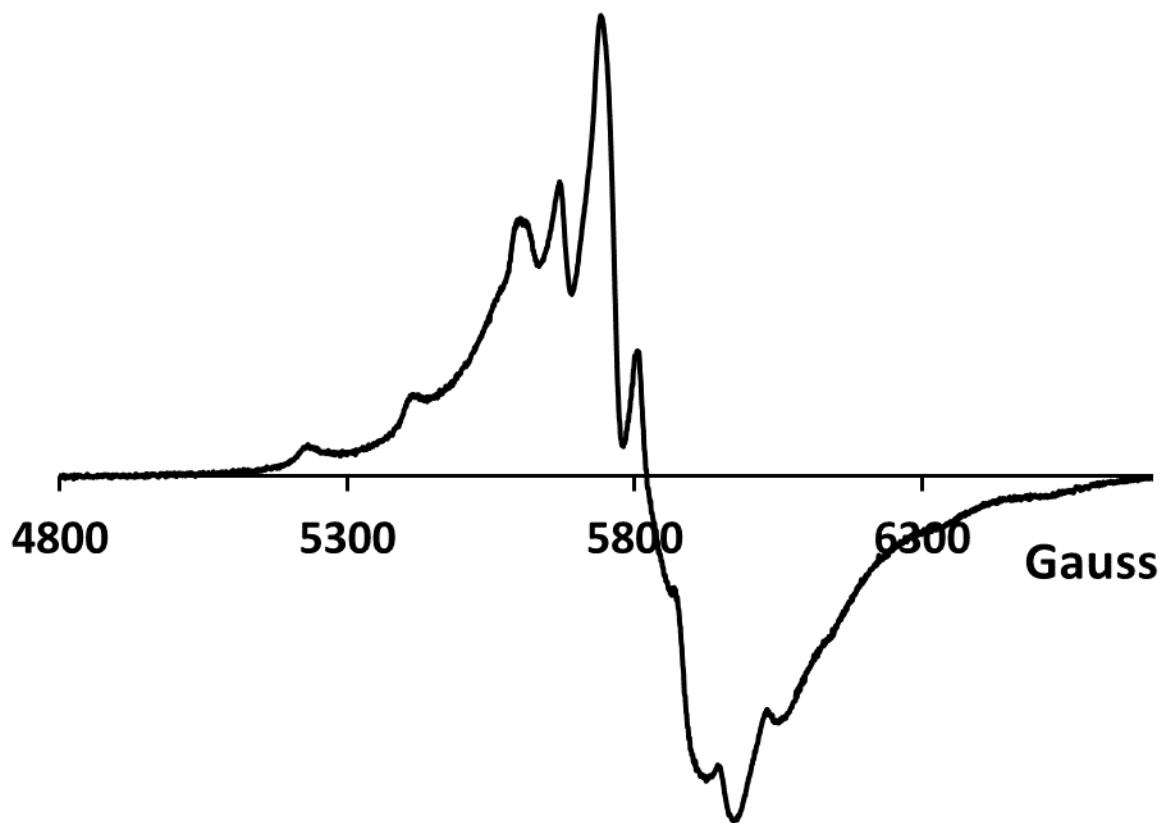

**Fig. S1** Powder X-band cw-EPR spectrum of 3 at 100 K.

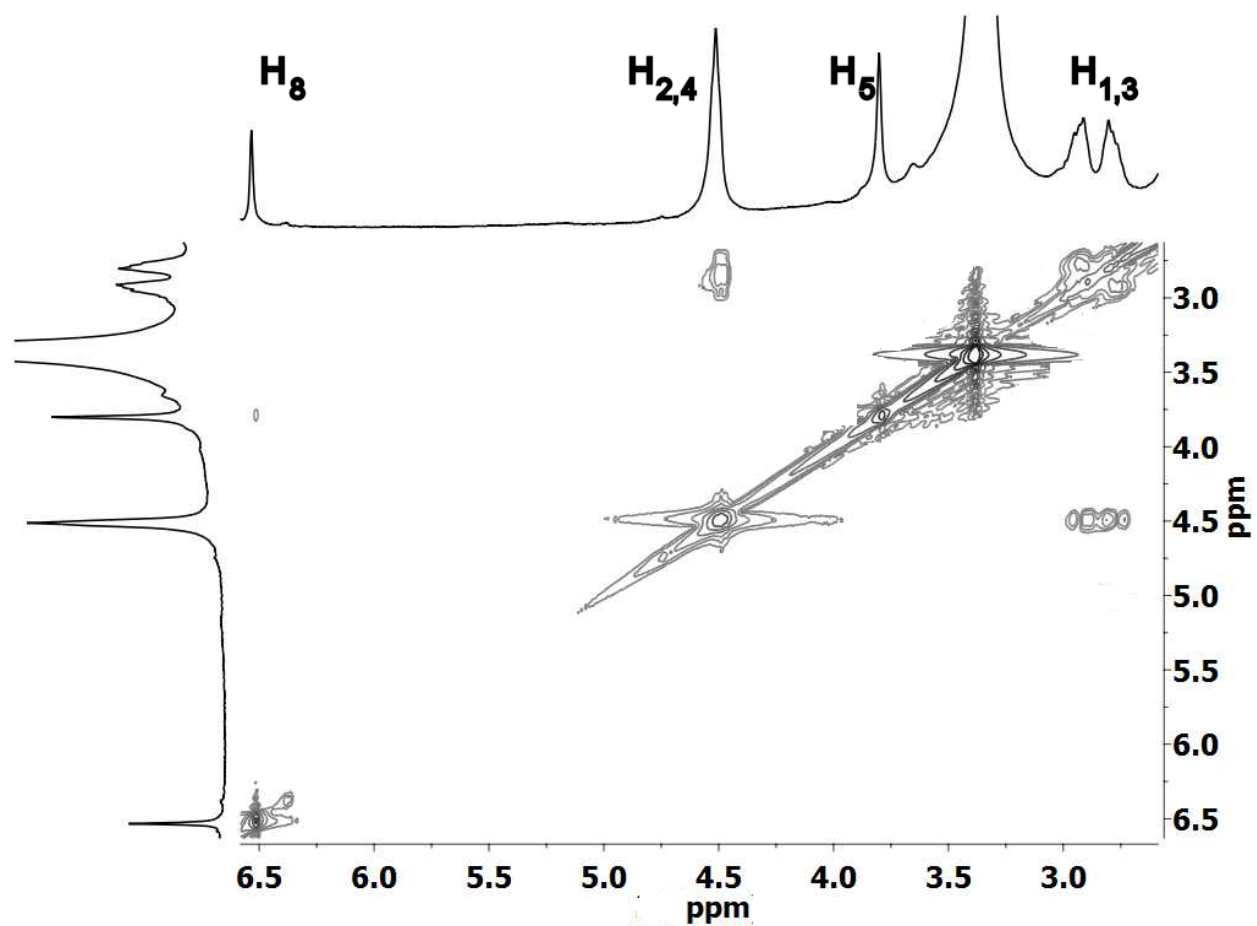

**Fig. S2** 2D $\{^1\text{H}\}$  gCOSY of **1** (10 mM in DMSO- $d_6$ ) at room temperature and assignments. Numbering according to Scheme 1.
